# Supplementary material for: Reconstitution of oral antibiotic suspensions for paediatric use in households: a cross-sectional study among caregivers of 3–5-year-old children from a selected district, Sri Lanka
Source: Springer Nature journal article supplement (doi:10.1186/s12887-024-04725-y), 2024-04-04
Supplement: MOESM1 [file 26945086]

1 **Supplementary File One**

2 **Sample size calculation**

3

4 
$$N = \frac{Z^2 P (1-P)}{d^2} \quad (1)$$

5

6 N = sample size

7 D = 0.05 (level of accuracy)

8 Z = 1.96 (critical value of specified confidence interval)

9 P = Expected proportion of caregivers of 3–5-year-old children with correct practice on  
10 reconstitution of oral antibiotic suspension. A study conducted in Palestine revealed that  
11 knowledge on preparation and storage of antibiotic suspensions for paediatrics was around 75 per  
12 cent (2). A similar study conducted in Taiwan among paediatric caregivers revealed good  
13 knowledge ranging from 46 per cent to 98 per cent depending on the specific aspect of preparation  
14 (3). Similar findings were exhibited in a few studies conducted in India with knowledge on  
15 preparation, storage and disposal ranging from 50 per cent to 90 per cent. However, Indian studies  
16 were mainly focused on adult medications with few questions on accessibility by children (4-6).  
17 However, no studies were done to specifically assess the knowledge on preparation, storage and  
18 disposal of oral paediatric medicinal drugs of caregivers. Thus, it was decided to use 50 per cent  
19 as P.

20 In primary caregivers of 3-5 year old children, correct practice on reconstitution of paediatric oral  
21 antibiotic medications were taken as  $P_p= 50$  per cent,  $P_s= 50$  per cent and  $P_d= 50$  per cent,  
22 respectively.

23

24 
$$N = \frac{1.96^2 \times 0.50 \times (1-0.50)}{0.05^2}$$

25

26 N= 384.16  $\approx$  385 primary caregivers of 3–5-year-old children

27

28 **Definition of a cluster**

29 A cluster was defined as a single clinic session of a Child Welfare Clinic (CWC) geographically  
30 located within boundaries of Ratnapura district.

31  
32 Rationale behind the decision for selecting a clinic session rather than a Child Welfare clinic was  
33 that each clinic session would consists of non-repetitive study units. As care givers of 3-5 years  
34 old children was attending Child Welfare clinics for the 3 years MMR (Measles Mumps and  
35 Rubella) vaccination and 5-year OPV (Oral Polio vaccine) & DT (Diphtheria and Tetanus)  
36 vaccination, there would not be a repetition or overlapping of study units. The cluster was based  
37 on vaccination session of a given clinic center and not on geographical area which the clinic center  
38 was situated.

39  
40 On rare occasions, children might be referred to CWC sessions to be assessed by the Medical  
41 Officer of Health regarding their nutrition status including children aged 3 to 5 years though  
42 Family Health Bureau have instructed to conduct a separate Nutrition clinic for such children. In  
43 such instances, they too were included in the study provided that they did not attended a CWC for  
44 3 years vaccination during the period of data collection.

45  
46 As cluster sampling method was used in this study, correction to the homogeneity within the cluster  
47 was added (7).

48  $N = \text{Design effect} \times n$

49  $\text{Design effect} = 1 + \delta (\beta - 1)$

50  $\beta =$  cluster size; taken as 10 (as expected average number of caregivers of 3–5-year-old  
51 children attending a single child welfare session in Ratnapura District was between 10-  
52 15, the cluster size was decided as 10)

53  
54  $\delta = \rho$ ; in the absence of previous studies, as mentioned by the Bennett and others estimated value  
55 of  $\rho$  was taken as 0.1 (8). The study population was caregivers of 3-5-year-old children. In a  
56 given cluster, families of different socio-economic and cultural backgrounds reside. Hence, there  
57 was adequate heterogeneity within clusters that justifies the use of 0.1 as the  $\rho$ .

58

59  
 60 Design effect = 1+ 0.1 (10-1) =1.9  
 61 Therefore, the required sample size= 384.16 x 1.9 = 729.9  
 62 ≈ 730 primary caregivers of 3–5-year-old children

63  
 64 After adding 10% for non-response,  
 65 730 /0.9 = 812

66  
 67 **Sample size was also calculated to accommodate potential associated factors.**

68  
 69 **Table S1- Prevalence of Poor Health Literacy According to Identified Associated Factors**  
 70 **among School Teachers in 2017, Colombo District**

| Identified condition / associated factor                                                              | P1    | P2    | OR  | Sample size |
|-------------------------------------------------------------------------------------------------------|-------|-------|-----|-------------|
| Age above 45                                                                                          | 27.3% | 36.7% | 1.6 | 502         |
| Good knowledge on health                                                                              | 26.4% | 35.7% | 1.5 |             |
| Mass media mode as printed media (newspaper, magazines) accessed to obtain health related information | 28.7% | 40.7% | 1.7 |             |

71  
 72 Above sample in Table one, consisted of schoolteachers in Colombo District of Sri Lanka.  
 73 Therefore, limited/ poor health literacy among general population in Ratnapura District most  
 74 probably should be more than the percentages reported as in Table 3.7. Therefore, the P1, limited  
 75 or poor health literacy among the population with the condition or positive for the associated factor  
 76 was taken as 35 per cent. P2, limited or poor health literacy among the population without the  
 77 condition or negative for the associated factor was taken as 45 per cent (9).

$$N = \frac{[z_{\alpha} \sqrt{P(1 - P)(1/q_1 + 1/q_2)} + z_{\beta} \sqrt{P_1(1 - P_1)(1/q_1) + P_2(1 - P_2)(1/q_2)}]^2}{(P_1 - P_2)^2} \quad (10)$$

78  
 79 P1= 35 per cent  
 80 P2= 45 per cent

81  $Z_{\alpha}$  = Confidence level -95% - 1.96

82  $Z_B$  =Power of 0.8- 0.84

83  $q_1$ = proportion of subjects in group 1- 0.5

84  $q_2$ = proportion of subjects in group 2- 0.5

85  $P = q_1P_1 + q_2P_2$

86  $N=750.283$

87  $N=751$

88

89 The required total sample size =751; 10% non-response rate= 835

90

91 Therefore, the final sample size was taken as 835.

92

93 Sample was selected from 10 Medical Officer of Health areas (out of 19 MOH areas) in Ratnapura  
94 District. As stated above the cluster size was decided as 10.

95

96 The data collection was carried out during the period of 4 months. Usually, 3- to 5-year-old  
97 children attend the CWCs to receive vaccination at 3 years (MMR) and 5 years (OPV and DT  
98 booster) according to the Expanded Programme of Immunization, Sri Lanka. And their growth  
99 monitoring programme is conducted in weighting centres and not in CWCs. Therefore, a child  
100 aged 3 to 5 years attending CWCs multiple times in a span of 4 months was highly unlikely. Thus,  
101 selecting the clinic session instead of clinic centre is justifiable. Usually, clinic sessions in a given  
102 clinic centre was held once a fortnight. However, in some clinic centres sessions are held weekly  
103 and in others, centres, once a month.

104

105 Number of clusters needed,  $835/10 = 84$

106 ***The approximate number of clusters available during a single selected month (No. of CWC  
107 sessions)***

108

109 Number of clinic centres which cater 3–5-year-old children in Ratnapura District - 273

110 Number of clinic centres which conduct clinics for 3–5-year-old children four times a month - 19

111 Number of clinic centres which conduct clinics for 3-5 year -old children twice a month - 155

112 Number of clinic centres which conduct clinics for 3–5-year-old children once a month - 89

113

114 **Total number of clinic sessions which cater to 3- 5-year-old children in Ratnapura District**  
115 **(per month)-  $(19 \times 4) + (155 \times 2) + 89 = 475$  per month**

116

117 Number of clinic sessions for 3 -5 year old children during the period of data collection (4 months)  
118 in Ratnapura District-  $(475 \times 4) = 1900$

119

120 As we selected only 10 Medical Officer of Health (MOH) areas out of a possible 19 MOH areas,  
121 on average, the estimated clinic sessions for the selected MOH areas for the period of data  
122 collection  $(273 \times 4) = 1092$  sessions

123 However, there was the risk of clinic attendance of 3–5-year-old children of less than 10 per  
124 session. Therefore additional 10 per cent clusters (9 clusters) were randomly selected as back-up  
125 if the desired number was not fulfilled by the initial 84 clusters during the planning stage (total of  
126 93 clinic sessions form 950 clinic sessions).

127

### 128 **Sampling frame**

129 A list of all CWCs in Ratnapura District was obtained from the Regional Director of Health  
130 Services Office. Number of total clusters in the study population would depend on number of clinic  
131 sessions per each Child Welfare clinic during the period of data collection which was first 4 months  
132 of the year 2021 (January to April).

133

### 134 **Sampling technique**

135 Two stage cluster sampling method was used.

136

137 No of clusters required= 84

138 However, due to low attendance of children due to the COVID 19 situation in Ratnapura District,  
139 in some MOH areas up-to 10 additional clusters were selected randomly (Final number of clusters-  
140 128) (In some days, Ratnapura reported the highest number of daily cases out of all districts in Sri  
141 Lanka). (Tables S2 & S3).

142

143  
144  
145  
146  
147  
148  
149  
150  
151  
152  
153  
154  
155  
156  
157  
158  
159  
160  
161  
162  
163  
164  
165  
166  
167  
168  
169  
170  
171  
172  
173

***First stage***

A list of all MOH areas was prepared. Each MOH area in the list was coded. The list was scrambled, and 10 MOH areas were randomly selected from the list with MS Excel.

1. Ratnapura MC
2. Weligepola
3. Udawalawe (Embilipitiya North)
4. Kuruwita
5. Kiriella
6. Pelmadulla
7. Nivithigala
8. Elapatha
9. Godakawela
10. Kahawatta

***Second stage***

Number of clusters per each selected Medical Officer of Health (MOH) area was determined by the proportion of 3-to-5-year-old children estimated to be in each selected MOH area for the year 2020 using probability proportionate sampling. A list containing number of 3-to-5-year-old children under care, per each selected MOH area for the year 2020 was created for this purpose. Above list was prepared by data obtained from Medical Officer of Maternal & Child Health, Ratnapura. Following the allocation of number of clusters per each MOH area, selection of clusters within each MOH area was carried out by simple random sampling technique. In each cluster, first ten caregivers that were registered by Public Health Midwives in Clinic Register who meet eligibility criteria was selected for the study.

**Table S2- Sample Size Allocated to Each MOH Area in Ratnapura District**

|    | <b>MOH area</b>                   | <b>3-5yr Children<br/>Under Care</b> | <b>Number Planned<br/>to Select from<br/>each MOH</b> | <b>Number Selected<br/>from each MOH</b> |
|----|-----------------------------------|--------------------------------------|-------------------------------------------------------|------------------------------------------|
| 1  | Elapatha                          | 1482                                 | 51                                                    | 56                                       |
| 2  | Embilipitiya North<br>(Udawalawe) | 2629                                 | 89                                                    | 81                                       |
| 3  | Godakawela                        | 3469                                 | 118                                                   | 118                                      |
| 4  | Kahawatta                         | 2012                                 | 69                                                    | 85*                                      |
| 5  | Kiriella                          | 1278                                 | 43                                                    | 41                                       |
| 6  | Kuruwita                          | 4105                                 | 140                                                   | 159*                                     |
| 7  | Nivithigala                       | 2313                                 | 79                                                    | 62*                                      |
| 8  | Pelmadulla                        | 3551                                 | 121                                                   | 89*                                      |
| 9  | Ratnapura MC                      | 2239                                 | 77                                                    | 90*                                      |
| 10 | Weligepola                        | 1420                                 | 48                                                    | 39                                       |
|    | <b>Total</b>                      | <b>24498</b>                         | <b>835</b>                                            | <b>820</b>                               |

175 \*Due to the COVID 19 pandemic and the lack of human resources (no permanent MOH) and logistic issues, the  
176 desired number of respondents were not recruited from Pelmadulla and Nivithigala MOH areas. Therefore, to  
177 compensate for the reduced number, a slightly higher number of respondents were recruited from three adjacent MOH  
178 areas, namely Ratnapura MC, Kuruwita and Kahawatta.

179

180

181

182

183

184

185

186

187

188

189

190 *Table S3- Number of Clusters Selected in Each MOH Area in Ratnapura District*

191

|    | <b>MOH area</b>                | <b>Number of Clinic Sessions Clusters Initially Recruited</b> | <b>Number of Clusters Selected from each MOH</b> |
|----|--------------------------------|---------------------------------------------------------------|--------------------------------------------------|
| 1  | Elapatha                       | 6                                                             | 12                                               |
| 2  | Embilipitiya North (Udawalawe) | 9                                                             | 15                                               |
| 3  | Godakawela                     | 12                                                            | 18                                               |
| 4  | Kahawatta                      | 7                                                             | 9                                                |
| 5  | Kiriella                       | 5                                                             | 8                                                |
| 6  | Kuruwita                       | 14                                                            | 25                                               |
| 7  | Nivithigala                    | 8                                                             | 8                                                |
| 8  | Pelmadulla                     | 13                                                            | 16                                               |
| 9  | Ratnapura MC                   | 8                                                             | 11                                               |
| 10 | Weligepola                     | 5                                                             | 6                                                |
|    | <b>Total</b>                   | <b>87</b>                                                     | <b>128</b>                                       |

192

193 **References**

- 194 1. Lwanga SK, Lemeshow S. Sample Size Determination in Health Studies; A Practical  
 195 Manual. Geneva: World Health Organization; 1991.
- 196 2. Al-Ramahi RJ, Zaid AAN, Anabousi H. Problems associated with reconstitution,  
 197 administration, and storage of antibiotic suspensions for pediatrics: a cross-sectional study in  
 198 Nablus city, Palestine. BMC Research Notes. 2015;8(1).
- 199 3. Hu H, Wu F-LL, Hu F-C, Yang H-Y, Lin S-W, Shen L-J. Effectiveness of Education  
 200 Programs About Oral Antibiotic Suspensions in Pediatric Outpatient Services. Pediatrics &  
 201 Neonatology. 2013;54(1):34-42.
- 202 4. Sivasankaran P, Mohammed EB, Ganesan N, Durai R. Storage and Safe Disposal of  
 203 Unwanted/Unused and Expired Medicines: A Descriptive Cross-Sectional Survey among Indian  
 204 Rural Population. Journal of Young Pharmacists. 2018;11(1):97-100.
- 205 5. Sil A, Sengupta C, Das AK, Sil PD, Datta S, Hazra A. A study of knowledge, attitude and  
 206 practice regarding administration of pediatric dosage forms and allied health literacy of  
 207 caregivers for children. Journal of Family Medicine and Primary Care. 2017;6(3):636-42.
- 208 6. Patel DP, Sneha C, Bhatt SP, S. DS. Storage and Disposal of Medicines In Home Among  
 209 Students. Journal of Pharmacy Research. 2016;10(6):343-50.
- 210 7. Abramson J, Abramson ZH. Research methods in community medicine : surveys,  
 211 epidemiological research, programme evaluation, clinical trials. 6 ed. New York: Wiley; 2008.



- 212 8. Bennett S, Woods T, Liyanage WM, Smith DL. A Simplified general method for cluster-  
213 sample surveys of health in developing countries. *World Health Statistics Quarterly*.  
214 1991;44(3):98-106.
- 215 9. Denuwara HMBH, Gunawardena NS. Level of health literacy and factors associated with  
216 it among school teachers in an education zone in Colombo, Sri Lanka. *BMC Public Health*.  
217 2017;17(1).
- 218 10. Hulley SB, Cummins SR, Browner WS, Grady DG, Newman TB. *Designing Clinical*  
219 *Research*. 3 ed: Lippincott Williams & Wilkins; 2007.
