# Supplementary material for: Reconstitution of oral antibiotic suspensions for paediatric use in households: a cross-sectional study among caregivers of 3–5-year-old children from a selected district, Sri Lanka
Source: Springer Nature journal article supplement (doi:10.1186/s12887-024-04725-y), 2024-04-04
Supplement: MOESM2 [file 26945086]

Reconstitution of oral antibiotic suspensions for paediatric use in households: A cross-sectional study among caregivers of 3–5-year-old children in a selected district, Sri Lanka

**Questionnaire**

**1.0 IDENTIFICATION**

|                             |  |  |  |
|-----------------------------|--|--|--|
| Serial Number               |  |  |  |
| MOH area:                   |  |  |  |
| PHM area:                   |  |  |  |
| Name of the Clinic:         |  |  |  |
| Sector (Urban/Rural/Estate) |  |  |  |

*Please underline the appropriate answer*

1.1 Who is the main carer of the child at home in given four time slots?

| Weekdays          |                 | Weekends          |                 |
|-------------------|-----------------|-------------------|-----------------|
| Daytime (6am-6pm) | Night (6pm-6am) | Daytime (6am-6pm) | Night (6pm-6am) |
| Mother            | Mother          | Mother            | Mother          |
| Father            | Father          | Father            | Father          |
| Grandparent       | Grandparent     | Grandparent       | Grandparent     |
| Relative          | Relative        | Relative          | Relative        |
| Maid              | Maid            | Maid              | Maid            |
| Other (sp.)       | Other (sp.)     | Other (sp.)       | Other (sp.)     |
| _____             | _____           | _____             | _____           |

1.2 Most of the time, who administer medicines to your child?

- Mother
- Father
- Grandparent
- Relative
- Maid
- Other (specify) \_\_\_\_\_

1.3 Most of the time, who prepare medicines to your child?

- Mother
- Father
- Grandparent
- Relative
- Maid
- Other (specify) \_\_\_\_\_

1.4 Your Relationship to the child

- Mother
- Father
- Grand parents
- Brother/ Sister
- Relative
- Legal guardian
- Other (specify) \_\_\_\_\_

1.5 Age of the child: Years 

|  |  |
|--|--|
|  |  |
|--|--|

 Months 

|  |  |
|--|--|
|  |  |
|--|--|

 Days 

|  |  |
|--|--|
|  |  |
|--|--|

1.6 Does your child attend a pre-school?

- Yes
- No

1.7 Do your child attend day-care?

- Day-care only
- After preschool day care
- Creche
- No

1.8 Does the child have elder sibling

- Yes
- No

## 2.0 DEMOGRAPHIC AND SOCIO-ECONOMIC DETAILS

2.1 How old are you at 1<sup>st</sup> of May, 2019

Years   Months   Days

*Please tick in the correct box*

2.2 What is Male  Female  your sex?

2.3 Which ethnicity do you belong?

|                       |                          |
|-----------------------|--------------------------|
| Sinhala               | <input type="checkbox"/> |
| Sri Lanka Tamil       | <input type="checkbox"/> |
| Indian Tamil          | <input type="checkbox"/> |
| Sri Lanka Moor        | <input type="checkbox"/> |
| Other (specify) _____ | <input type="checkbox"/> |

2.4 What is your highest Educational level?

|                                                              |                          |
|--------------------------------------------------------------|--------------------------|
| No formal schooling                                          | <input type="checkbox"/> |
| Grade1-5; Not completed Grade 5 (Some primary education)     | <input type="checkbox"/> |
| Completed grade 5 (Completed primary)                        | <input type="checkbox"/> |
| Grade6-10; Not completed Grade 10 (Some secondary education) | <input type="checkbox"/> |
| Completed grade 10 (Completed secondary education)           | <input type="checkbox"/> |
| Grade 11 or higher (Higher than secondary education)         | <input type="checkbox"/> |

2.5 What is your current paid employment?

*If employed, tick the appropriate employment group and skip to Section 3.0*

|                                                   |                          |
|---------------------------------------------------|--------------------------|
| Legislators, senior officials and managers        | <input type="checkbox"/> |
| Professionals                                     | <input type="checkbox"/> |
| Technicians and associate professionals           | <input type="checkbox"/> |
| Clerks                                            | <input type="checkbox"/> |
| Service workers and shop and market sales workers | <input type="checkbox"/> |
| Skilled agricultural and fishery workers          | <input type="checkbox"/> |
| Craft and related trades workers                  | <input type="checkbox"/> |
| Plant and machine operators and assemblers        | <input type="checkbox"/> |
| Elementary occupations                            | <input type="checkbox"/> |
| Armed forces and others                           | <input type="checkbox"/> |
| Self-employed                                     | <input type="checkbox"/> |
| Not employed                                      | <input type="checkbox"/> |

2.6 If you are not employed, what are you doing at present?

|                           |  |
|---------------------------|--|
| Student                   |  |
| Home maker                |  |
| Retired                   |  |
| Unemployed (able to work) |  |

### 3.0 HOUSEHOLD AND HOUSING CHARACTERISTICS (wealth Index)

3.1 Main source of drinking water and water for cooking for member of your household

| Source                               | Drinking water | Source                               | Water for cooking |
|--------------------------------------|----------------|--------------------------------------|-------------------|
| Protected well                       |                | Protected well                       |                   |
| Semi-protected well                  |                | Semi-protected well                  |                   |
| Unprotected well                     |                | Unprotected well                     |                   |
| Tap within unit                      |                | Tap within unit                      |                   |
| Tap within premises but outside unit |                | Tap within premises but outside unit |                   |
| Tap outside premises                 |                | Tap outside premises                 |                   |
| Rural water supply project           |                | Rural water supply project           |                   |
| Tube well                            |                | Tube well                            |                   |
| Bowser                               |                | Bowser                               |                   |
| River/Tank/Streams/Spring            |                | River/Tank/Streams/Spring            |                   |
| Rain water                           |                | Rain water                           |                   |
| Bottle water                         |                | Bottle water                         |                   |
| Other (specify):                     |                | Other (specify):                     |                   |

3.2 What kind of toilet facility do member of your household usually use?

|                                 |  |
|---------------------------------|--|
| Flush to piped sewer system     |  |
| Flush to septic tank            |  |
| Flush to pit latrine            |  |
| Flush to somewhere else         |  |
| Flush don't know where          |  |
| Ventilated improved pit latrine |  |
| Pit latrine - with slab         |  |

3.3 Do you use cooker or stove for cooking usually?

|        |  |
|--------|--|
| Cooker |  |
| Stove  |  |

3.4 What is the main source of fuel used in your household for cooking?

|                             |  |
|-----------------------------|--|
| Electricity                 |  |
| Gas (LP)                    |  |
| Kerosene                    |  |
| Saw dust/Rice husk/Charcoal |  |
| Other (Specify):            |  |

3.5 What is the main source of lighting for your household?

|                               |  |
|-------------------------------|--|
| National grid electricity     |  |
| Rural Hydro power electricity |  |
| Kerosene                      |  |
| Solar power                   |  |
| Other (Specify):              |  |

3.6 Principal materials of construction of the housing unit

| A. Roof               |  | B. Walls           |  | C. Floor              |  |
|-----------------------|--|--------------------|--|-----------------------|--|
| Tile                  |  | Brick              |  | Cement                |  |
| Asbestos              |  | Cement block/stone |  | Terrazzo/Tile/Granite |  |
| Concrete              |  | Cabook             |  | Mud                   |  |
| Zink Aluminum sheet   |  | Pressed soil brick |  | Wood                  |  |
| Metal sheet           |  | Mud                |  | Sand                  |  |
| Cadjan/Palmyrah/Straw |  | Cadjan/Palmyrah    |  | Concrete              |  |
| Other (specify)       |  | Plank/Metal sheet  |  | Other (specify)       |  |
|                       |  | Other (specify)    |  |                       |  |

3.7 Does your household have following items/sources?

|                  |  |
|------------------|--|
| Electricity      |  |
| Solar power      |  |
| Watch/clock      |  |
| Radio            |  |
| Television       |  |
| Mobile telephone |  |
| Telephone land   |  |
| Refrigerator     |  |
| Computer         |  |
| Washing machine  |  |
| Rice cooker      |  |

3.8 Does any member of this household own,

|                      |  |
|----------------------|--|
| Bicycle              |  |
| Motorcycle/ scooter  |  |
| Trishaw              |  |
| Tractor/ land master |  |
| Car/Van/Jeep         |  |
| Bus/Lorry/Truck      |  |

### 3.9 The house you live in

|                             |  |
|-----------------------------|--|
| Owned by a household member |  |
| Government owned            |  |
| Private owned (rent/ lease) |  |
| Occupied free of rent       |  |
| Encroached                  |  |
| Other (specify)             |  |
| Domestic staff              |  |

## **Interviewer Guide on Observation of Preparation of paediatric oral anti-infective suspensions**

This will be a practical station

There will be 3 substations for the practical

- 1) Washing hands
- 2) Preparation of paediatric oral anti-infective suspension
- 3) Taking 5ml to an of the reconstituted paediatric oral anti-infective suspension appropriate measuring cup

### **1. Washing hands**

Please complete 4.3.1 and 4.3.2 sections of the check list after observation

#### **Command to participants: “Please wash your hands appropriately”**

- If a working tap with a sink is available within the premises, station should be located near the sink.
- Soap should be placed near the sink
- If no sink or tap is available, use the empty basin and water bawl provided for you. Please place the soap near the empty basin with the water bawl.
- Please refer visual aid 1 for correct technique of hand washing.
- Time allocated for this activity is 30 seconds
- Please request the participant to move to next station as soon as time expires.

### **2. Preparation of paediatric oral anti-infective suspension**

Please complete 4.3.3 to 4.3.7 sections of the check list after observation

#### **Command to participants- “Select the most appropriate water jar to select water for reconstitution”**

- There will be 3 water jars.
  - Tap cool water
  - Boiling water
  - Boiled cooled water

- Near these 3 jars there will be paediatric oral anti-infective suspension bottle for the activity
- Time allocated for this activity is 1 minute.
- Please request the participant to move to next station as soon as time expires.

### 3. Taking 5ml of the reconstituted paediatric oral anti-infective suspension to an appropriate measuring cup

Please complete 4.3.8 to 4.3.10 sections of the check list after observation

**Command to participants: “Please take 5ml of the reconstituted paediatric oral anti-infective suspension to an appropriate measuring device”**

- There will be following measuring devices.
  - Measuring cup
  - Table spoon
  - Dropper
- Lid of a paediatric oral anti-infective suspension bottle
- Time allocated for this activity is 30 seconds.
- Following 30 seconds please request the participant to stop the activity.

Preparation of paediatric oral anti-infective suspensions and fill the following Checklist

| No | Observation                                                                               | Correct | Incomplete | Incorrect |
|----|-------------------------------------------------------------------------------------------|---------|------------|-----------|
| 1  | Wash the hands with clean water and soap                                                  |         |            |           |
| 2  | Wipe the hands with clean cloth                                                           |         |            |           |
| 3  | Shake the bottle to loosen the powder                                                     |         |            |           |
| 4  | Take water- boiled cooled water                                                           |         |            |           |
| 5  | Fill the bottle with water to just below the line marked in the bottle or label           |         |            |           |
| 6  | Close the lid and invert the bottle shake well                                            |         |            |           |
| 7  | Top up with boiled cooled water up-to the line marked in the bottle or label              |         |            |           |
| 8  | Selecting the appropriate measuring device                                                |         |            |           |
| 9  | Open the bottle and take 5ml to the selected appropriate measuring device (Measuring cup) |         |            |           |
| 10 | Tightly close the lid                                                                     |         |            |           |
