# Supplementary material for: Reconstitution of oral antibiotic suspensions for paediatric use in households: a cross-sectional study among caregivers of 3–5-year-old children from a selected district, Sri Lanka
Source: Springer Nature journal article supplement (doi:10.1186/s12887-024-04725-y), 2024-04-04
Supplement: MOESM3 [file 26945086]

### Supplementary File Three- Assessment Criteria for the Checklist

**Table S4- Assesemnt Criteria for the Checklist**

|   | <b>Demonstrated Practice</b>          | <b>Correct</b>                                                                                                                                                                                                                                                                                                                                                                                                                                                                                                                                         | <b>Incomplete</b>                                                                    | <b>Incorrect/ Not performed</b>                                                   |
|---|---------------------------------------|--------------------------------------------------------------------------------------------------------------------------------------------------------------------------------------------------------------------------------------------------------------------------------------------------------------------------------------------------------------------------------------------------------------------------------------------------------------------------------------------------------------------------------------------------------|--------------------------------------------------------------------------------------|-----------------------------------------------------------------------------------|
| 1 | Wash hands                            | <p>CDC Five steps in hand washing- First four steps</p> <ol style="list-style-type: none"> <li>1. Wet your hands with clean, running water (warm or cold), turn off the tap, and apply soap.</li> <li>2. Lather your hands by rubbing them together with the soap. Lather the backs of your hands, between your fingers, and under your nails.</li> <li>3. Scrub your hands for at least 20 seconds. Need a timer? Hum the “Happy Birthday” song from beginning to end twice.</li> <li>4. Rinse your hands well under clean, running water.</li> </ol> | <p>Only a single step is missed except the step:<br/>The use of soap/ hand wash.</p> | <p>If the order is not followed or if soap/ hand wash is not used.</p>            |
| 2 | Wipe hands on cloth/tissue            | Dry your hands using a clean towel (CDC's fifth step in hand washing)                                                                                                                                                                                                                                                                                                                                                                                                                                                                                  | If water remains in hands after drying                                               | Did not dry or wipe the hands using inappropriate cloth (e.g., own trousers)      |
| 3 | Shake the bottle to loosen the powder | Shaking the bottle holding the bottle in between the two fingers (from the top and bottle of the bottle)                                                                                                                                                                                                                                                                                                                                                                                                                                               | Only rolling horizontally placing it between the palms of the hands                  | Did not do                                                                        |
| 4 | Take boiled cooled water              | Taking the boiled cooled water after reading the label in the bottle                                                                                                                                                                                                                                                                                                                                                                                                                                                                                   | Taking the boiled cooled water without properly reading the label in the bottle      | Did not take the boiled cooled water                                              |
| 5 | Fill below the line in the bottle     | Fill about two-thirds below the line in the bottle                                                                                                                                                                                                                                                                                                                                                                                                                                                                                                     | Filled close to the marked line in the bottle                                        | Filled over the line or filled below half away from the marked line in the bottle |

|    |                                         |                                                                                                                                                                                                                                                |                                                                                                                                                                              |                                                                             |
|----|-----------------------------------------|------------------------------------------------------------------------------------------------------------------------------------------------------------------------------------------------------------------------------------------------|------------------------------------------------------------------------------------------------------------------------------------------------------------------------------|-----------------------------------------------------------------------------|
| 6  | Close the bottle, shake it well         | Shaking the bottle vigorously holding the bottle in between two fingers (from the top and bottle of the bottle) for at least 5 seconds (count to five)                                                                                         | Either did not shake the bottle vigorously holding the bottle by the two fingers (from the top and bottle of the bottle) or did not shake at least 5 seconds (count to five) | Did not shake at all or only rolled horizontally between palms of the hands |
| 7  | Top up to the line                      | Filled up to the line with 5% or less (or more) of the 100ml (This was performed after the participant completed the demonstration by separately calculating the amount in the measurement device (by a pipette) and the amount in the bottle) | Between 5% to 10%                                                                                                                                                            | More than 10%                                                               |
| 8  | Select the appropriate measuring device | Selection of measuring cup                                                                                                                                                                                                                     | Selection of a different measure device and then changing over to the correct device at the start of the step 9                                                              | Wrong measuring device and attempting to take 5 ml from the selected device |
| 9  | Take 5 ml to the measuring device       | Measured amount within 10 percent of 5 ml,                                                                                                                                                                                                     | Measured amount between 10 and 20 percent of 5 ml                                                                                                                            | Measured amount more or less than 20 percent of 5 ml.                       |
| 10 | Tightly close the lid                   | Lid is closed tightly                                                                                                                                                                                                                          | The lid id not tight after closing                                                                                                                                           | Not closely the lid                                                         |
