# Supplementary material for: Reconstitution of oral antibiotic suspensions for paediatric use in households: a cross-sectional study among caregivers of 3–5-year-old children from a selected district, Sri Lanka
Source: Springer Nature journal article supplement (doi:10.1186/s12887-024-04725-y), 2024-04-04
Supplement: MOESM4 [file 26945086]

**Supplementary File 4- Socioeconomic characteristics of the primary caregivers**

**Table S5- Distribution of Respondents According to the Sector (N=820)**

| MOH area     | Sector    |              |            |              |           |              |            |              |
|--------------|-----------|--------------|------------|--------------|-----------|--------------|------------|--------------|
|              | Urban     |              | Rural      |              | Estate    |              | Total      |              |
|              | No        | %            | No         | %            | No        | %            | No         | %            |
| Elapatha     | 0         | 0.0          | 55         | 98.2         | 1         | 1.8          | 56         | 100.0        |
| Godakawela   | 0         | 0.0          | 106        | 89.8         | 12        | 10.2         | 118        | 100.0        |
| Kahawatta    | 0         | 0.0          | 77         | 90.6         | 8         | 9.4          | 85         | 100.0        |
| Kiriella     | 0         | 0.0          | 39         | 95.1         | 2         | 4.9          | 41         | 100.0        |
| Kuruwita     | 0         | 0.0          | 157        | 98.7         | 2         | 1.3          | 159        | 100.0        |
| Nivithigala  | 0         | 0.0          | 59         | 95.1         | 3         | 4.9          | 62         | 100.0        |
| Pelmadulla   | 0         | 0.0          | 84         | 94.4         | 5         | 5.6          | 89         | 100.0        |
| Ratnapura MC | 90        | 100.0        | 0          | 0.0          | 0         | 0.0          | 90         | 100.0        |
| Udawalawe    | 0         | 0.0          | 80         | 98.7         | 1         | 1.3          | 81         | 100.0        |
| Weligepola   | 0         | 0.0          | 39         | 100.0        | 0         | 0.0          | 39         | 100.0        |
| <b>Total</b> | <b>90</b> | <b>100.0</b> | <b>696</b> | <b>100.0</b> | <b>34</b> | <b>100.0</b> | <b>820</b> | <b>100.0</b> |

MOH area- Medical Officer of Health area

**Table S6- Distribution of Respondents According to the Level of Education (N=820)**

| MOH area     | Level of Education     |            |            |             |                  |             |            |              |
|--------------|------------------------|------------|------------|-------------|------------------|-------------|------------|--------------|
|              | No Schooling/Grade 1-5 |            | Grade 6-10 |             | Grade 11 & Above |             | Total      |              |
|              | No                     | %          | No         | %           | No               | %           | No         | %            |
| Elapatha     | 1                      | 1.8        | 5          | 8.9         | 50               | 89.3        | 56         | 100.0        |
| Godakawela   | 4                      | 3.4        | 39         | 33.1        | 75               | 63.6        | 118        | 100.0        |
| Kahawatta    | 5                      | 5.9        | 23         | 27.1        | 57               | 67.1        | 85         | 100.0        |
| Kiriella     | 1                      | 2.4        | 2          | 4.9         | 38               | 92.7        | 41         | 100.0        |
| Kuruwita     | 4                      | 2.5        | 8          | 5.0         | 147              | 92.5        | 159        | 100.0        |
| Nivithigala  | 6                      | 9.7        | 6          | 9.7         | 50               | 80.6        | 62         | 100.0        |
| Pelmadulla   | 3                      | 3.4        | 32         | 36.0        | 54               | 60.7        | 89         | 100.0        |
| Ratnapura MC | 4                      | 4.4        | 9          | 10.0        | 77               | 85.6        | 90         | 100.0        |
| Udawalawe    | 2                      | 2.5        | 42         | 51.9        | 37               | 45.7        | 81         | 100.0        |
| Weligepola   | 0                      | 0.0        | 15         | 48.5        | 24               | 61.5        | 39         | 100.0        |
| <b>Total</b> | <b>30</b>              | <b>3.7</b> | <b>181</b> | <b>22.1</b> | <b>609</b>       | <b>74.3</b> | <b>820</b> | <b>100.0</b> |

MOH area- Medical Officer of Health area

**Table S7- Employment Status and Current Employment of the Respondents According to the Sector (N=820)**

| Variable                                          | Sector    |              |            |              |           |              |            |              |
|---------------------------------------------------|-----------|--------------|------------|--------------|-----------|--------------|------------|--------------|
|                                                   | Urban     |              | Rural      |              | Estate    |              | Total      |              |
|                                                   | No        | %            | No         | %            | No        | %            | No         | %            |
| <b>Employment status</b>                          |           |              |            |              |           |              |            |              |
| Employed                                          | 15        | 16.7         | 124        | 17.8         | 20        | 58.8         | 159        | 19.4         |
| Housewife/housework                               | 61        | 67.8         | 514        | 73.9         | 11        | 32.4         | 586        | 71.5         |
| Retired/student                                   | 0         | 0.0          | 5          | 0.7          | 0         | 0.0          | 5          | 0.6          |
| Unemployed                                        | 14        | 15.6         | 53         | 7.6          | 3         | 8.8          | 70         | 8.5          |
| <b>Total</b>                                      | <b>90</b> | <b>100.0</b> | <b>696</b> | <b>100.0</b> | <b>34</b> | <b>100.0</b> | <b>820</b> | <b>100.0</b> |
| <b>Employment*</b>                                |           |              |            |              |           |              |            |              |
| Armed forces and others                           | 0         | 0.0          | 4          | 3.2          | 0         | 0.0          | 4          | 2.5          |
| Clerks                                            | 0         | 0.0          | 12         | 9.7          | 0         | 0.0          | 12         | 7.5          |
| Craft and related trades workers                  | 1         | 6.7          | 9          | 7.3          | 1         | 5.0          | 11         | 6.9          |
| Elementary occupations                            | 3         | 20.0         | 18         | 14.5         | 19        | 95.0         | 40         | 25.2         |
| Legislators, senior officials and managers        | 3         | 20.0         | 18         | 14.5         | 0         | 0.0          | 21         | 13.2         |
| Plant and machine operators and assemblers        | 0         | 0.0          | 2          | 1.6          | 0         | 0.0          | 2          | 1.3          |
| Professionals                                     | 5         | 33.3         | 43         | 34.7         | 0         | 0.0          | 48         | 30.2         |
| Service workers and shop and market sales workers | 3         | 20.0         | 14         | 11.3         | 0         | 0.0          | 17         | 10.7         |
| Skilled agricultural and fishery workers          | 0         | 0.0          | 2          | 1.6          | 0         | 0.0          | 2          | 1.3          |
| Technicians and associate professionals           | 0         | 0.0          | 2          | 1.6          | 0         | 0.0          | 2          | 1.3          |
| <b>Total</b>                                      | <b>15</b> | <b>100.0</b> | <b>124</b> | <b>100.0</b> | <b>20</b> | <b>100.0</b> | <b>159</b> | <b>100.0</b> |

\*Classification of the employment was based on the ISCO-08 occupation categorisation
